# Supplementary material for: Understanding public opinion to the introduction of minimum unit pricing in Scotland: a qualitative study using Twitter
Source: PubMed Central journal article supplement (PMC6576115; doi:10.1136/bmjopen-2019-029690), 2019-06-14
Supplement: bmjopen-2019-029690.draft_revisions.pdf [file bmjopen-2019-029690.draft_revisions.pdf]

# BMJ Open

BMJ Open is committed to open peer review. As part of this commitment we make the peer review history of every article we publish publicly available.

When an article is published we post the peer reviewers' comments and the authors' responses online. We also post the versions of the paper that were used during peer review. These are the versions that the peer review comments apply to.

The versions of the paper that follow are the versions that were submitted during the peer review process. They are not the versions of record or the final published versions. They should not be cited or distributed as the published version of this manuscript.

BMJ Open is an open access journal and the full, final, typeset and author-corrected version of record of the manuscript is available on our site with no access controls, subscription charges or pay-per-view fees (<http://bmjopen.bmj.com>).

If you have any questions on BMJ Open's open peer review process please email [info.bmjopen@bmj.com](mailto:info.bmjopen@bmj.com)

# BMJ Open

## Understanding public opinion to the introduction of Minimum Unit Pricing in Scotland: a qualitative study using Twitter

|                               |                                                                                                                                                                                                                                                        |
|-------------------------------|--------------------------------------------------------------------------------------------------------------------------------------------------------------------------------------------------------------------------------------------------------|
| Journal:                      | <i>BMJ Open</i>                                                                                                                                                                                                                                        |
| Manuscript ID                 | bmjopen-2019-029690                                                                                                                                                                                                                                    |
| Article Type:                 | Research                                                                                                                                                                                                                                               |
| Date Submitted by the Author: | 05-Feb-2019                                                                                                                                                                                                                                            |
| Complete List of Authors:     | Astill Wright, Laurence; University of York, Department of Health Sciences<br>Golder, Su; University of York,<br>Balkham, Adam; University of York, Department of Health Sciences<br>McCambridge, J; University of York, Department of Health Sciences |
| Keywords:                     | Alcohol, Scotland, Public Policy, Public Opinion, Social Media, Internet                                                                                                                                                                               |
|                               |                                                                                                                                                                                                                                                        |

SCHOLARONE™  
Manuscripts

1  
2 *Paper type:*

3 Original paper  
4  
5

6 *Manuscript title:*

7 Understanding public opinion to the introduction of Minimum Unit Pricing in Scotland: a qualitative study  
8 using Twitter  
9

10  
11 *Author names and affiliations:*

12 Laurence Astill Wright<sup>1</sup>, Su Golder<sup>1</sup>, Adam Balkham<sup>1</sup> and Jim McCambridge<sup>1</sup>  
13

14 <sup>1</sup>Department of Health Sciences, University of York, UK  
15

16  
17 *Correspondence to:*

18 Laurence Astill Wright  
19 Department of Health Sciences  
20 University of York  
21 Heslington  
22 York  
23 YO10 5DD  
24 Tel: 01904321344  
25 Fax: 01904 321383  
26 laurencewright@doctors.org.uk  
27

28  
29 *Keywords*

30 Ethanol  
31 Scotland  
32 Public Policy  
33 Public Opinion  
34 Social Media  
35 Internet  
36

37  
38 *Word count:*

39 3117  
40

41 *Abstract*

42  
43 *Background and Aims*

44 On 1st May 2018 Minimum Unit Pricing (MUP) of alcohol was introduced in Scotland. This study aimed to  
45 assess responses to the policy implementation in comments made on Twitter.  
46

47  
48 *Methods*

49 All tweets relating to MUP were captured during the two weeks after the introduction of the policy. These  
50 tweets were assessed using a mixture of human and machine coding for relevance, sentiment and source. A  
51 thematic analysis was conducted.  
52

53  
54 *Results*

55 74,639 tweets were collected over 14 days. Study findings demonstrate that opinion on the introduction of  
56 MUP in Scotland is divided, as far as is discernible on Twitter, with a slightly higher proportion of positive  
57 posts, particularly in Scotland itself. Furthermore, 55% of positive tweets/retweets were originally made by  
58 health or alcohol policy-related individuals or organisations. Thematic analysis of tweets showed some  
59 evidence of misunderstanding around policy issues.  
60

*Conclusions*

1  
2 It is possible to appreciate the divided nature of public opinion on the introduction of MUP in Scotland using  
3 Twitter, the nature of the sentiment around it, and key actors involved, and it will be possible to later study  
4 how this changes when the policy becomes more established.  
5

6 *Declaration of Interests*

7 We declare no competing interests.  
8

9 *Strengths and Limitations*

- 10 - This is the largest social media analysis conducted on alcohol policy with analysis of 53,574 relevant  
11 tweets and the first to use a mixture of human and machine classification  
12  
13 - Classification was not perfect but agreement between coders was very good  
14  
15 - Twitter is not representative of the general population  
16  
17  
18  
19  
20  
21  
22  
23  
24  
25  
26  
27  
28  
29  
30  
31  
32  
33  
34  
35  
36  
37  
38  
39  
40  
41  
42  
43  
44  
45  
46  
47  
48  
49  
50  
51  
52  
53  
54  
55  
56  
57  
58  
59  
60

For peer review only

## Background

Over the last 40 years the relative price of alcohol has decreased significantly in many countries throughout the world. Alcohol has never been as widely available and affordable as it currently is and this is primarily due to taxation falling behind increased earnings and inflation.[1] To combat the 3.3 million deaths worldwide each year and 5.1% of the global burden of disease, the World Health Organisation (WHO) recommends appropriate taxation and pricing policy in order to increase the cost of alcohol as part of an overall public health strategy to reduce harmful drinking.[2,3]

Increasing alcohol prices consistently reduces consumption[4] and a minimum unit price (MUP) of 50p in Scotland is forecasted to decrease the consumption of harmful drinkers by 7%, hazardous drinkers by 2.5% and moderate drinkers by 1.2%.[5] Changes in taxation alone would require a 70% increase to cause similar reductions of 7% in consumption by harmful drinkers.[5] In comparison, minimum unit pricing (MUP) specifically targets the cheapest drinks favoured by the heaviest drinkers.[4]

In the second half of the twentieth century Scotland has struggled with the increasing health, social and economic consequences of greater alcohol consumption more so than the rest of the United Kingdom (UK).[6] Average weekly unit consumption and rates of chronic liver disease and cirrhosis are higher than in England and Wales.[6] There are significant economic costs in healthcare provision, crime, and lost productivity.[8] It is predicted that MUP will reduce the number of deaths due to alcohol by 60, hospital admissions by 1300 and crimes by 3500 in the first year alone.[5]

After a series of legal challenges and national debate lasting five years, MUP was approved by the UK Supreme Court and was introduced to Scotland on 1 May 2018.[9] It has been demonstrated that alcohol industry submissions made to a Scottish government consultation in 2008 misrepresented the peer reviewed literature surrounding alcohol health policy. [31] The arguments made against MUP during this consultation, such as the concern of a new black market alcohol industry, were reiterated by Scottish and UK newspapers in 2011 and 2012. Some newspapers argued that MUP would be ineffective and it would punish responsible drinkers and the poor, while those that advocated for MUP argued that it would reduce health and social harms. [7]

Public perception appears to be changing over time on MUP with the 2015 British Social Attitudes survey suggesting that 52% of British adults support MUP, 25% are against it and 22% are unsure,[10] compared to a British 2011 YouGov survey which suggested 47% and 44% for and against it respectively, while 9% were unsure.[11] A 2011 focus group study had suggested that British participants held largely negative attitudes towards MUP due to 'a misunderstanding of the minimum price per unit policy itself' and 'the failure to recognise the significance of small incremental reductions in alcohol consumption'.[12] A further focus group study identified beliefs consistently associated with negative attitudes of pricing policy;[13] pricing policies will make no difference to behaviour, the government considers the national economy to be more important than the health of the general public and that government cannot be trusted.[13]

When comparing the popularity of alcohol policy approaches in a discrete choice experiment, Pechey et al.[14] demonstrate that MUP is less favoured than both regulating alcohol marketing and decreasing the number of alcohol sales outlets when consumption, health and social outcomes are not considered. However, Pechey et al.[14] do show that the popularity of MUP increases from 43% to 63% when considering its significant effects in reducing consumption and social harms. In the UK there are no robust relationships between socioeconomic status and support for alcohol policy options.[15] In other countries it has been found that heavier drinkers (whose drinking is most damaging to themselves and others) are less supportive of alcohol policy change.[16,17] Pechey et al.[14] suggest that policy makers should focus on the beneficial outcomes when advocating for MUP to increase public support.

Few studies have used online social media to try to ascertain public attitudes towards change in alcohol policy. Twitter is a social networking website where users can broadcast their opinions to a public audience. As of late 2017, Twitter had 330 million active monthly users[18] and has great potential as a resource for quantitative and qualitative analysis of public opinion. Stautz et al.[19] analysed the reaction to the updated UK alcohol guidelines in 2017, identifying that the majority of tweets were unsupportive of the adjustments,

1  
2 which reduced the advised limits for low risk drinking downwards for men, and that the community as a  
3 whole was largely opposed to alcohol policy measures. No other studies have attempted to assess public  
4 reaction to alcohol-related policy changes using Twitter, although studies have assessed the perception of  
5 cannabis use,[20] electronic cigarettes[21] and electronic cigarette marketing.[22]  
6

7 This study used Twitter posts to quantify sentiment expressed online during the introduction of MUP,  
8 conducts a thematic analysis of these perceptions, and analyses which Twitter users are associated with  
9 which particular sentiments. Our specific research questions were as follows: 1. What are the proportions of  
10 positive, negative and neutral tweets? 2. What themes are commonly expressed? 3. Which Twitter users are  
11 expressing which themes? 4. Do the results mirror population survey data and other qualitative research  
12 surrounding MUP?  
13  
14  
15  
16

### 17 *Methods*

18 Data were collected from Twitter using the Gnip PowerTrack firehose provided by Discovertext (a text  
19 analytics software - <https://discovertext.com>). Discovertext, which has been used in previous Twitter  
20 research,[22] was also used to archive and machine-code tweets. Data collection started on 29 April 2018,  
21 with the introduction of MUP on 1 May 2018. Due to the large volume of tweets collected, data collection  
22 was stopped at 14 days ending on 12th May 2018. Research methods were in accordance with Rivers' and  
23 Lewis'[23] recommendations for the ethical use of Twitter data.  
24

25 Search terms were trialled using Twitter's free search Application Programming Interface (API -  
26 <https://twitter.com/search-advanced>). Terms that produced more than one search result relating to MUP on  
27 the first page of search results were included. Different terms and spellings were trialled, and hashtags that  
28 were repeatedly mentioned in tweets were included. Slang terms for alcohol were identified using online  
29 thesauruses (e.g [www.urbandictionary.com](http://www.urbandictionary.com)) and promising search terms included. Only English language  
30 tweets were included. The Twitter firehose was used to collect all publicly available tweets corresponding to  
31 the relevant search terms.  
32

33 The final search strategy was:

34  
35 ((minimum unit price) OR (minimum unit pricing) OR (minimum pricing) OR (minimum price) OR  
36 (minimum alcohol price) OR (minimum alcohol pricing) OR (minimum booze price) OR (minimum booze  
37 pricing) OR (min booze price) OR (min booze pricing) OR (min unit price) OR (min unit pricing) OR (min  
38 alcohol price) OR (min alcohol pricing) OR (MUP) OR (50p unit) OR (Scotland alcohol) OR (Scotland  
39 booze) OR (Scotland bevy) OR (Scotland min price) OR (Scotland min pricing) OR (alcohol unit) OR  
40 (minimum price per unit) OR (cheap booze Scotland) OR (minimum cost alcohol) OR (min cost alcohol) OR  
41 #minimumunitpricing OR #mupsaveslives OR #MUP) lang:en  
42  
43

44 Tweets were initially coded as relevant or irrelevant by a single human coder. The human coder's  
45 endeavours were used to train Discovertext's machine classifier using a Naive Bayes algorithm. This allows  
46 machine coding of remaining tweets and was then applied to the full selection of tweets. While the algorithm  
47 was excellent at excluding irrelevant tweets, sometimes these irrelevant tweets were incorrectly classified as  
48 relevant. This was an iterative process and so the machine classifier was retrained until it reached an  
49 acceptable degree of accuracy. The agreement between machine classifier and human coder (LAW) was  
50 calculated using a kappa score on an overlapping selection of 100 tweets. The human coder's work was  
51 validated against a second human coder (AB) on an overlapping selection of 500 tweets. Irrelevant tweets  
52 were then discarded.  
53

54 Once relevant tweets were separated from irrelevant, a similar process was used to classify tweets according  
55 to sentiment. A single human coder classified relevant tweets into positive, negative and neutral. The coding  
56 of the primary coder was validated against the coding of the second human coder using a kappa score on an  
57 overlapping sample of 200 tweets. Series of 200 tweets were double classified until kappa scores greater than  
58 0.7 were achieved and this was used to train a new custom machine classifier that was applied to all the  
59 relevant tweets. Inaccuracies in machine coding were refined by human coding of key tweets to retrain the  
60

1  
2 algorithm. Again, machine coding was validated using a kappa score on an overlapping sample of 100  
3 tweets.  
4

5 Once relevant tweets were separated into positive, negative and neutral, a random sample of 500 tweets was  
6 taken from each of the three subgroups using DiscoverText's random sampling tool. These 1500 tweets were  
7 analysed and single coded to assess the predominant themes. Prior to assessment we reviewed previous  
8 media arguments for and against MUP,[7] and various public surveys[24] to establish the range of  
9 anticipated themes (4 positive, 8 negative). This was an iterative process and when a theme was not  
10 congruent with the anticipated themes, it was considered a newly emerging theme and this was added. 2 new  
11 themes emerged through this process, 1 positive and 1 negative.  
12

13 New themes, in addition to those already identified, emerged only in the initial stages of analysis and no new  
14 themes emerged in the later stages of analysis (the final 150 tweets of each 500 tweet sample). Thus it was  
15 determined that sufficient saturation had been reached, and no additional tweets needed to be examined. The  
16 popularity of each theme was also assessed in each random sample.  
17

18 These three random samples of 500 tweets were also analysed to determine the source of the tweets. A single  
19 human coder examined each author's Twitter page. For each tweet/retweet, the username, full name,  
20 associated biography and the associated results from an internet search engine (<https://www.google.com>)  
21 were examined to determine the user's background. The same process was used to determine if the source  
22 self identified as Scottish or lived in Scotland or not (only 1.6% of Twitter users have their geolocation  
23 activated and so inferences must be made from their profile).[25] For example, Twitter profiles contain a  
24 space for a user to write their location and if this was a Scottish place it was assumed that the user was  
25 Scottish. Some users did not write a location but had explicit references to the place they lived in their  
26 tweets. A chi-squared test was used to determine if there was statistical significance ( $p$ -value  $<0.05$ ) between  
27 location and sentiment.  
28  
29

### 30 *Results*

31 74,639 tweets were collected over 14 days. 62,879 of these tweets were manually coded as either 'relevant'  
32 to MUP or 'not relevant' by the same coder (LAW). The Naive Bayes algorithm subsequently coded the  
33 remaining 11,760 tweets. 500 tweets were coded by both the primary coder and a second coder (AB). Of  
34 these 500 tweets, there was a 97% agreement with a kappa score of 0.95. This indicates an excellent level of  
35 agreement. In order to validate the coding of the algorithm, 100 tweets were coded by both the primary coder  
36 (LAW) and the algorithm. For these 100 tweets there was a 97% agreement with a kappa score of 0.94,  
37 providing further reassurance about reliability on relevance.  
38  
39

40 53,574 (72%) tweets were classified as relevant, while 21,065 (28%) were classified as 'not relevant'. The  
41 irrelevant tweets made no reference to the MUP of alcohol in any context. These 53,574 relevant tweets were  
42 subsequently classified according to sentiment. 57,801 tweets were manually coded. 18,741 were coded as  
43 positive (35%), 14,866 as negative (28%), 17,302 as neutral (32%), and 2665 as not relevant (5%). In the  
44 200 tweets coded by both the primary and secondary coder there was a kappa score of 0.75. The kappa  
45 scores were: positive - 0.79, negative - 0.74, neutral - 0.76, not relevant - 0.73. This shows good agreement  
46 for sentiment tweets. For 100 tweets coded by both the primary coder (LAW) and the algorithm there was a  
47 96% agreement with a kappa score of 0.94.  
48

49 From each sentiment (positive, negative and neutral) 500 randomly selected tweets were analysed for  
50 predominant themes. These were elaborated through the process of thematically coding each tweet and new  
51 themes were added as they occurred until saturation was reached. Twitter based thematic analysis is difficult  
52 to automate using machine algorithms due to the abbreviations, emoticons and sarcasm[26] and we relied  
53 exclusively on human coding. The findings are presented in Table 1. Perceived ability to reduce health harms  
54 was the most prominent theme in the positive tweets, skepticism about effects on problem drinkers was the  
55 most prominent in the negative tweets, and factual information were the most prominent theme in the neutral  
56 tweets. In each of these sentiment categories a small proportion of tweets (ranging from 1.6-5.2%) were  
57 found to be misclassified. Some were irrelevant but falsely classified as relevant, while some were of another  
58 sentiment. It is impossible to say whether it was human or machine coding which produced this error.  
59  
60

*Table 1: Results of thematic analysis of positive, negative and neutral tweets with paraphrased examples*

| <i>Theme of positive tweets</i>                                              | <i>n</i> | <i>%</i> | <i>Paraphrased example</i>                                                                                           |
|------------------------------------------------------------------------------|----------|----------|----------------------------------------------------------------------------------------------------------------------|
| Reduces health harms                                                         | 352      | 70.4     | Minimum Unit Pricing will decrease hospital admissions and save lives #mupsaveslives                                 |
| Reduces social harms                                                         | 13       | 2.6      | This will greatly reduce alcohol-fuelled violence and other countries must follow                                    |
| Effectively targets the cheapest, strongest alcohol                          | 36       | 7.2      | Strong cider sold at pocket money prices is hugely damaging                                                          |
| Scotland has an alcohol problem and something must be done                   | 26       | 5.2      | This country has an awful relationship with drink - let's try MUP                                                    |
| MUP is an evidence-based policy                                              | 5        | 1.0      | The evidence backs MUP, which has been approved by the courts and will be extensively evaluated with a sunset clause |
| Nil reason given                                                             | 60       | 12.0     | Excellent work from the SNP!                                                                                         |
| Incorrectly classified as positive                                           | 8        | 1.6      |                                                                                                                      |
| Total                                                                        | 500      | 100      |                                                                                                                      |
| <i>Theme of negative tweets</i>                                              |          |          |                                                                                                                      |
| <i>Theme of negative tweets</i>                                              | <i>n</i> | <i>%</i> | <i>Paraphrased example</i>                                                                                           |
| Alcoholics will not decrease their alcohol intake                            | 138      | 27.6     | Alcoholics will not buy less but their children will go without so they can get it                                   |
| Increase in illicit alcohol production and/or encourage cross-border trading | 71       | 14.2     | Hoards will rush over the border to stock up on frosty jacks - who would've thought we'd have a booze cruise in 2018 |
| Anti-libertarian                                                             | 54       | 10.8     | First the sugar tax and now this - the nanny state won't stop                                                        |
| A tax on the poor                                                            | 52       | 10.4     | Another example of a classist poor-bashing policy                                                                    |
| Increase in drug use and/or petty crime                                      | 23       | 4.6      | Neds will rob grannies for booze money and the jakeys will turn to drugs instead                                     |
| Punishes responsible drinkers                                                | 17       | 3.4      | A few people can't drink responsibly and now everyone else has to pay the price?                                     |
| Increases retailer profits                                                   | 6        | 1.2      | All this will do is line the pockets of billionaires - the supermarkets can't believe their luck                     |
| Harms businesses                                                             | 2        | 0.4      | How many jobs will be lost from this?                                                                                |
| Alcohol consumption is a cultural problem                                    | 3        | 0.6      | Other countries with cheap alcohol don't have the same problems - the problem isn't to do with the price             |
| Nil reason given                                                             | 108      | 21.6     | This new alcohol law is embarrassing bs #SNPfail                                                                     |
| Incorrectly classified as negative                                           | 26       | 5.2      |                                                                                                                      |
| Total                                                                        | 500      | 100      |                                                                                                                      |
| <i>Theme of neutral tweets</i>                                               |          |          |                                                                                                                      |
| <i>Theme of neutral tweets</i>                                               | <i>n</i> | <i>%</i> | <i>Paraphrased example</i>                                                                                           |
| Factual                                                                      | 301      | 60       | Scotland introduces new alcohol law                                                                                  |
| Humour                                                                       | 102      | 20       | Great that Scotland are adopting the alcohol pricing design they have trialled for so long at the Edinburgh fringe   |
| Balanced/Unclear Sentiment                                                   | 82       | 16       | On the one hand it could reduce overconsumption of alcohol, but on the other it could encourage a black market       |
| Incorrectly classified as neutral                                            | 15       | 3        |                                                                                                                      |



The random samples of 500 tweets divided by sentiment were next classified according to the background of the Twitter user who posted the tweet. In the case of retweets this was the original tweeter. It was not possible to determine who retweets were made by. The users were divided up into the groups as in Table 2. Miscellaneous users were those accounts who did not fall into any of the other groups and largely consisted of private companies and spam accounts.

Table 2: Source analysis of tweets and retweets from positive, negative and neutral sub-groups

|          |   | Original source of tweet or retweet |                                               |                                    |                                                  |                         |               |                                                     | Total |
|----------|---|-------------------------------------|-----------------------------------------------|------------------------------------|--------------------------------------------------|-------------------------|---------------|-----------------------------------------------------|-------|
|          |   | Member of public                    | Health/alcohol policy organisation/individual | Media/news organisation/individual | Alcohol industry-related organisation/individual | Celebrity/public figure | Miscellaneous | Incorrectly classified as positive/negative/neutral |       |
| Positive | n | 85                                  | 275                                           | 91                                 | 1                                                | 17                      | 25            | 6                                                   | 500   |
|          | % | 17                                  | 55                                            | 18.2                               | 0.2                                              | 3.4                     | 5.0           | 1.2                                                 | 100   |
| Negative | n | 287                                 | 53                                            | 56                                 | 5                                                | 2                       | 81            | 16                                                  | 500   |
|          | % | 57.4                                | 10.6                                          | 11.2                               | 1.0                                              | 0.4                     | 16.2          | 3.2                                                 | 100   |
| Neutral  | n | 189                                 | 45                                            | 109                                | 18                                               | 10                      | 120           | 9                                                   | 500   |
|          | % | 37.8                                | 9.0                                           | 21.8                               | 3.6                                              | 2.0                     | 24            | 1.8                                                 | 100   |

When discerning if the source self identified as Scottish or lived in Scotland or not, we used a chi-square test and found that positive tweets were more often to be from Scottish Twitter accounts (see Table 3) (p-value 0.002). Negative tweets were just as likely to be from not obviously Scottish twitter accounts (p-value 0.066) and neutral tweets were less likely to be from Scottish twitter accounts (p-value 0.001).

Table 3: Source nationality analysis of tweets and retweets from positive, negative and neutral subgroups

|          |   | Source nationality |                        |                        |                                            | Total |
|----------|---|--------------------|------------------------|------------------------|--------------------------------------------|-------|
|          |   | Likely Scottish    | Not obviously Scottish | Unable to view profile | Not correctly assigned the right sentiment |       |
| Positive | n | 293                | 187                    | 14                     | 6                                          | 500   |
|          | % | 58.6               | 37.4                   | 2.8                    | 1.2                                        | 100   |
| Negative | n | 218                | 204                    | 65                     | 13                                         | 500   |
|          | % | 43.6               | 40.8                   | 13                     | 2.6                                        | 100   |
| Neutral  | n | 219                | 259                    | 13                     | 9                                          | 500   |
|          | % | 43.8               | 51.8                   | 2.6                    | 1.8                                        | 100   |

## Discussion

Study findings demonstrate that public opinion on the introduction of MUP in Scotland was divided, with a slightly higher proportion of positive posts than negative or neutral, particularly in Scotland itself. These findings mirror previous survey data that suggest a growing proportion of the British public favour MUP than are against it.[10]

Public opinion alone does not dictate alcohol policy and there is often significant industry and political will to resist change. There do, however, remain complex interactions between public opinion and shifts in alcohol policy. Österberg and colleagues[27] demonstrate that a decrease in alcohol excise duty in Finland in 2004 and a subsequent rise in alcohol related harm led to an increase in support for alcohol policies to counteract these trends. In Ireland high levels of alcohol consumption and a doubling of alcohol related street violence over seven years led to public discussion which culminated in increased alcohol taxation, via increased support for alcohol policies.[28] There is some suggestion in this study and the literature on which it draws that Scotland has followed a similar pattern to Finland and Ireland where it appears that an increase in alcohol harms has prompted public discussion putting alcohol policy change on policy agendas. A more nuanced historical study would be needed to investigate how far this is true, and the roles of political actors in relation to public opinion.[29,30]

In 1984 John Kingdon proposed that shifts in public policy require the overlapping of three different factors - the public acknowledgement of a problem, a clear solution to a problem, and also the political will to address the issue. [31] In relation to MUP there was first a public discussion of the harms of alcohol consumption. Researchers and public health experts subsequently paid more attention to restrictive alcohol policies as a solution to this problem, and then the SNP showed the political will to address these alcohol harms. These three factors may have overlapped to create a unique 'window of opportunity' to introduce MUP.

Only one other study has examined social media responses (analysing 3061 tweets) to alcohol policy-related developments.[19] The present study is thus the largest conducted on alcohol policy with analysis of 53,574 relevant tweets and the first to use a mixture of human and machine classification. Stautz et al.[19] showed a predominantly negative reaction to updated alcohol guidelines (27.4% negative vs 6.8% positive). There are several interpretations of the large difference in sentiment between the updated alcohol guidelines and the introduction of MUP. While it is possible that public support for MUP is far greater, it is also possible that because Stautz et al.[19] only followed one hashtag (while we followed 29 different synonyms accounting for different terminology and spellings), this procedure yielded a less representative sample. In our study the most popular hashtag relating to MUP was only used in 3.8% of relevant tweets and so we would not recommend searching based on hashtags alone when conducting future alcohol policy-related research.

Thematic analysis of positive tweets showed less variation in arguments supporting MUP than against it. 70.4% of positive tweets focused on the health benefits of MUP and a minority focused on other views. This reflects the introduction of MUP for primarily public health reasons. Furthermore, health/alcohol policy organisations/individuals tweets or retweets were the original sources of the majority of positive tweets surrounding MUP. This suggested a coordinated response by health care professionals and public health organisations focusing on a single message - that MUP reduces alcohol-related health problems. These findings highlight the important implications for advocacy groups of investing in social media to influence public opinion.

Additionally, our study found that 24.9% of the 1500 randomly selected sentiment tweets were made by health/alcohol policy-related Twitter accounts, while Stautz et al.[19] demonstrated 12.4% of tweets relating to the updated UK alcohol guidelines were made by health related individuals/organisations. The responses of health advocacy groups to MUP appears to be more effective than that to alcohol guidelines, in part because of the ongoing failure to implement UK public information campaigns on the new guidelines, and the remarkable refusal of alcohol producers to carry the revised guidelines on alcohol packaging. As Pechey et al.[14] recommend, Scottish policy-makers have given prominence to the expected outcomes of MUP.

1  
2 Thus we suggest that when engaging with social media, public health advocacy groups should be aware of  
3 the potential reach of their messages and use this as an opportunity to advance public understanding of the  
4 issues and support for policy measures underpinned by evidence, focusing on the anticipated outcomes  
5 specifically.  
6

7 Many of the negative themes expressed were similar to alcohol industry framings of the issues from earlier  
8 on in the public debate.[32,33] Following on from the industry's attempts to obstruct the implementation of  
9 MUP through legal processes, the alcohol actors we identified through Twitter continued to propagate the  
10 negative framing of MUP in an attempt to marginalise those arguments based on peer-reviewed literature.  
11 Yet, by the time of implementation of the policy, it is striking how little such activity there was by industry  
12 actors.  
13

14 The similarity we have demonstrated in findings between Twitter-based research to gauge public perceptions  
15 and general population surveys may provide some support for social media-based methods as adjuncts to  
16 survey based opinion polling. We showed that 35% of tweets were positive, 28% were negative and 32%  
17 were neutral. Similarly the 2011 YouGov survey suggested that 47% supported MUP, while 44% opposed it  
18 and 9% were unsure. [11] Likewise the 2015 British Social Attitudes survey suggests that 52% of British  
19 adults support MUP, while 25% are against it and 22% are unsure. [10] Gauging public opinion via social  
20 media has numerous practical advantages over polling, though validation methods remain to be developed.  
21 There will probably be lower costs given that the data are already in the public domain, and machine  
22 algorithms can be used to code items with high inter-rater reliability with human coders. Social media  
23 research does, however, bring with it new ethical challenges that must be considered by future  
24 researchers.[34]  
25

26  
27 The limitations of our work include a degree of uncertainty about the inferences about public opinion that  
28 can be made from this data. Twitter users are unlikely to be representative of the general population, as they  
29 are more likely to be urban dwelling, male, and have higher educational achievement.[35,36] Twitter users  
30 tend to hold more extreme views[37] and surround themselves with those who hold similar opinions (in what  
31 is know as echo-chambers).[38] This makes inferences in relation to previous polling data questionable.  
32 Furthermore, classification was not perfect and 3.3% of tweets were included in the wrong sentiment group  
33 in our random sample of 1500 tweets. It is also possible our results were subject to confounding, for  
34 example, political affiliation. Many accounts provided limited biographical information and so this was not  
35 measured or adjusted for. Nonetheless, it is possible to appreciate the divided nature of public opinion on the  
36 introduction of MUP, the nature of the sentiment around it, and key actors involved, and it will be possible to  
37 later study how this changes when the policy becomes more established.  
38  
39

#### 40 *Ethical Approval*

41 The University of York Health Sciences Research Governance Committee was consulted who recommended  
42 that the study did not require full ethical approval as the Twitter data used were already in the public domain.  
43  
44

#### 45 *Contributors*

46 LAW, SG and JM were responsible for the original study design. LAW was responsible for primary data  
47 coding, analysis and for initial drafting of this report. AB was the second coder. LAW, SG, AB and JM were  
48 responsible for subsequent interpretation, editing and rewriting for the report.  
49

#### 50 *Funding*

51 This work was supported by a Wellcome Trust Investigator Award in Humanities and Social Science  
52 (200321/Z/15/Z) to JM.  
53

#### 54 *Declaration of Interests*

55 We declare no competing interests.  
56  
57

#### 58 *References*

59 1. Babor T. Caetano R. 2010. Alcohol: No Ordinary Commodity. 2nd edition. New York: Oxford University  
60 Press. ISBN: 0199551146.

2. Monteiro M. 2011. The Road to a World Health Organization Global Strategy for Reducing the Harmful Use of Alcohol. *Alcohol Res Health*. 34(2). PMID: [22330226](#).
3. World Health Organization. 2010. Global Strategy to Reduce Harmful Use of Alcohol [Online]. Available at: [http://www.who.int/substance\\_abuse/activities/gsrhua/en/](http://www.who.int/substance_abuse/activities/gsrhua/en/). Accessed 16/08/2018 ([Archived by WebCite® at http://www.webcitation.org/71mmbuaiB](#)).
4. Sharma A. Sinha K. Vandenberg, B. 2017. Pricing as a means of controlling alcohol consumption. *Br Med Bull*. 123(1). PMID: 28910991.
5. Angus C. Holmes J. Pryce R. Meier P. Brennan A. 2016. Model-based appraisal of the comparative impact of Minimum Unit Pricing and taxation policies in Scotland. An adaptation of the Sheffield Alcohol Policy Model version 3 [Online]. Available at: [https://www.sheffield.ac.uk/polopoly\\_fs/1.565373!/file/Scotland\\_report\\_2016.pdf](https://www.sheffield.ac.uk/polopoly_fs/1.565373!/file/Scotland_report_2016.pdf). Accessed: 06/05/18 ([Archived by WebCite® at http://www.webcitation.org/71mlo3iju](#)).
6. Leon D. McCambridge J. (2006). Liver cirrhosis mortality rates in Britain from 1950 to 2002: an analysis of routine data. *Lancet*. 367(9504). PMID: 16399153.
7. Hilton S. Wood K. Patterson C. Katikireddi, S. 2014. Implications for alcohol minimum unit pricing advocacy: What can we learn for public health from UK newsprint coverage of key claim-makers in the policy debate? *Soc Sci Med*. 102(100). PMID: [24565153](#).
8. Scottish Government. 2008. Changing Scotland's relationship with alcohol: a discussion paper on our strategic approach [Online]. Available at: <http://www.gov.scot/Resource/Doc/227785/0061677.pdf>. Accessed: 06/05/18 ([Archived by WebCite® at http://www.webcitation.org/71mmCjRMw](#)).
9. Meier P. Brennan A. Angus C. Holmes J. 2017. Minimum unit pricing for alcohol clears final legal hurdle in Scotland. *BMJ*. 359. PMID: 29162561.
10. NatCen Social Research. 2015. Attitudes to alcohol. Findings from the 2015 British Social Attitudes survey [Online]. Available at: <http://bsa.natcen.ac.uk/media/39126/bsa-attitudes-to-alcohol-final.pdf>. Accessed: 09/05/2018 ([Archived by WebCite® at http://www.webcitation.org/71mm05C1f](#)).
11. YouGov. 2011. 'Pocket money' prices [Online]. Available at: <https://yougov.co.uk/news/2011/01/25/pocket-money-prices-alcohol/>. Accessed: 07/05/2018 ([Archived by WebCite® at http://www.webcitation.org/71mmQgn15](#)).
12. Hagger M. Lonsdale A. Baggott R. Penny G. Bowen M. 2011. The Cost of Alcohol: The Advocacy for a Minimum Price per Unit in the UK [Online]. Available at: [http://alcoholresearchuk.org/downloads/finalReports/FinalReport\\_0082](http://alcoholresearchuk.org/downloads/finalReports/FinalReport_0082). Accessed 07/05/18 ([Archived by WebCite® at http://www.webcitation.org/71mltCAb8](#)).
13. Somerville C. Marteau T. Kinmonth A. Cohn S. 2015. Public attitudes towards pricing policies to change health-related behaviours: a UK focus group study. *Eur J Public Health*. 25(6). PMID: 25983329.
14. Pechey R. Burge P. Mentzakis E. Suhreke M. Marteau M. 2014. Public acceptability of population-level interventions to reduce alcohol consumption: a discrete choice experiment. *Soc Sci Med*. 113. PMID: 24858928.
15. Erskine S. Maheswaran R. Pearson T. Gleeson D. 2010. Socioeconomic deprivation, urban-rural location and alcohol-related mortality in England and Wales. *BMC Public Health*. 10(99). PMID: 20184763.

1  
2  
3  
4  
5  
6  
7  
8  
9  
10  
11  
12  
13  
14  
15  
16  
17  
18  
19  
20  
21  
22  
23  
24  
25  
26  
27  
28  
29  
30  
31  
32  
33  
34  
35  
36  
37  
38  
39  
40  
41  
42  
43  
44  
45  
46  
47  
48  
49  
50  
51  
52  
53  
54  
55  
56  
57  
58  
59  
60

16. Giesbrecht N, Lalomiteanu A, Anglin L, Adlaf E. 2007. Alcohol marketing and retailing: Public opinion and recent policy developments in Canada. *Journal of Substance Use*. 6. doi:10.1080/14659890701262189.
17. Giesbrecht N, and Livingston M. 2014. Public perceptions and alcohol policies: Six case studies that examine trends and interactions. *Drug Alcohol Rev*. 33(3). doi:10.1111/dar.12139.
18. Statista. 2018. Number of monthly active Twitter users worldwide from 1st quarter 2010 to 4th quarter 2017 (in millions) [Online]. Available at: <https://www.statista.com/statistics/282087/number-of-monthly-active-twitter-users/>. Accessed: 08/05/2018 (Archived by WebCite® at <http://www.webcitation.org/71mmJR0Bd>).
19. Stautz K, Bignardi G, Hollands G, Marteau T, et al. 2017. Reactions on Twitter to updated alcohol guidelines in the UK: a content analysis. *BMJ Open* 7(2). doi:10.1136/bmjopen-2016-015493.
20. Thompson L, Rivara F, Whitehill J. 2013. Prevalence of Marijuana-Related Traffic on Twitter, 2012–2013: A Content Analysis. *Cyberpsychol Behav Soc Netw*. 18(6). PMID: 26075917.
21. Cole-Lewis H, Pugatch J, Sanders A, Varghese A, Posada S, Yun, C, Schwarz M, Auguston E. 2015. Social Listening: A Content Analysis of E-Cigarette Discussions on Twitter. *J Med Internet Res*. 17(10). PMID: 26508089.
22. Huang J, Kornfield R, Szczypka G, Emery S. 2014. A cross-sectional examination of marketing of electronic cigarettes on Twitter. *Tob Control*. 23(3). PMID: 24935894.
23. Rivers C, Lewis B. 2014. Ethical research standards in a world of big data. *F1000Research*. 38(1-10). doi:10.12688/f1000research.3-38.v1.
24. Alcohol Policy UK. 2016. British Social Attitudes survey 2015: is support for minimum pricing growing? [Online]. Available at: <http://www.alcoholpolicy.net/2016/09/social-survey-attitudes-2015-is-support-for-minimum-pricing-growing.html>. Accessed 04/05/18 (Archived by WebCite® at <http://www.webcitation.org/71mlXdIwf>).
25. Leetaru K, Wang S, Cao G, Padmanabhan A, Shook E. 2013. Mapping the global Twitter heartbeat: The geography of Twitter. *First Monday*. 18(5). doi:10.5210/fm.v18i5.4366.
26. Thelwall M, Buckley K, Paltoglou G. 2012. Sentiment strength detection for the social Web. *Journal of the American Society for Information Science and Technology*. 63(1). doi:10.1002/asi.21662.
27. Österberg E, Lindeman M, Karlsson T. 2014. Changes in alcohol policies and public opinions in Finland 2003-2013. *Drug Alcohol Rev*. 33(3). PMID: 24628708.
28. Hope A. 2014. The ebb and flow of attitudes and policies on alcohol in Ireland 2002–2010. *Drug Alcohol Rev*. 33(3). PMID: 24628739.
29. Holden C, Hawkins B. 2014. ‘Whisky gloss’: The alcohol industry, devolution and policy communities in Scotland. *Public Policy & Administration*. 28. doi:10.1177/0952076712452290.
30. McCambridge J, Hawkins B, Holden C. 2014. Vested interests in addiction research and policy. The challenge corporate lobbying poses to reducing society's alcohol problems: insights from UK evidence on minimum unit pricing. *Addiction*. 109(2). PMID: 24261642.
31. Béland, D, Howlett, M. 2016. The Role and Impact of the Multiple-Streams Approach in Comparative Policy Analysis. *Journal of Comparative Policy Analysis*. 18(3).

- 1  
2 32. McCambridge J. Hawkins B. Holden C. 2013. Industry use of evidence to influence alcohol policy: a  
3 case study of submissions to the 2008 Scottish government consultation. *PLoS Med.* 10(4). PMID:  
4 23630458.  
5  
6 33. Hawkins B. McCambridge J. 2014. Industry Actors, Think Tanks, and Alcohol Policy in the United  
7 Kingdom. *Am J Public Health.* 104(8). PMID: 24922137.  
8  
9 34. Golder S. Ahmed S. Norman G. Booth A. 2017. Attitudes Toward the Ethics of Research Using Social  
10 Media: A Systematic Review. *J Med Internet Res.* 19(6). PMID: 28588006.  
11  
12 35. Mellon J. Prosser C. 2017. Twitter and Facebook are not representative of the general population:  
13 Political attitudes and demographics of British social media users. *Research and Politics.* 1(9).  
14 doi:10.1177/2053168017720008.  
15  
16 36. Mislove A. Lehmann S. Ahn Y. Onella J. Rosenquist J. 2011. Understanding the demographics of  
17 Twitter users. *Proceedings of the Fifth International AAAI Conference on Weblogs and Social Media.* AAAI  
18 Press. ISBN: 9781577355052.  
19  
20 37. Barberá P. Rivero G. 2014. Understanding the Political Representativeness of Twitter Users. *Social  
21 Science Computer Review.* 33(6). doi:10.1177/0894439314558836.  
22  
23 38. Garimella K. De Francisci Morales G. Gionis A. Mathioudakis M. 2018. Political Discourse on Social  
24 Media: Echo Chambers, Gatekeepers, and the Price of Bipartisanship. *WWW 2018: The 2018 Web  
25 Conference.* doi:[10.1145/3178876.3186139](https://doi.org/10.1145/3178876.3186139).  
26  
27  
28  
29  
30  
31  
32  
33  
34  
35  
36  
37  
38  
39  
40  
41  
42  
43  
44  
45  
46  
47  
48  
49  
50  
51  
52  
53  
54  
55  
56  
57  
58  
59  
60

# BMJ Open

## Understanding public opinion to the introduction of Minimum Unit Pricing in Scotland: a qualitative study using Twitter

|                                 |                                                                                                                                                                                                                                                                                      |
|---------------------------------|--------------------------------------------------------------------------------------------------------------------------------------------------------------------------------------------------------------------------------------------------------------------------------------|
| Journal:                        | <i>BMJ Open</i>                                                                                                                                                                                                                                                                      |
| Manuscript ID                   | bmjopen-2019-029690.R1                                                                                                                                                                                                                                                               |
| Article Type:                   | Research                                                                                                                                                                                                                                                                             |
| Date Submitted by the Author:   | 09-Apr-2019                                                                                                                                                                                                                                                                          |
| Complete List of Authors:       | Astill Wright, Laurence; University of York, Department of Health Sciences<br>Golder, Su; University of York, Department of Health Sciences<br>Balkham, Adam; University of York, Department of Health Sciences<br>McCambridge, J; University of York, Department of Health Sciences |
| <b>Primary Subject Heading</b>: | Public health                                                                                                                                                                                                                                                                        |
| Secondary Subject Heading:      | Addiction, Health policy, Mental health, Gastroenterology and hepatology                                                                                                                                                                                                             |
| Keywords:                       | Alcohol, Scotland, Pubic Policy, Public Opinion, Social Media, Internet                                                                                                                                                                                                              |
|                                 |                                                                                                                                                                                                                                                                                      |

SCHOLARONE™  
Manuscripts

1  
2 *Paper type:*

3 Original paper  
4  
5

6 *Manuscript title:*

7 Understanding public opinion to the introduction of Minimum Unit Pricing in Scotland: a qualitative study  
8 using Twitter  
9  
10

11 *Author names and affiliations:*

12 Laurence Astill Wright<sup>1</sup>, Su Golder<sup>1</sup>, Adam Balkham<sup>1</sup> and Jim McCambridge<sup>1</sup>  
13

14 <sup>1</sup>Department of Health Sciences, University of York, UK  
15  
16

17 *Correspondence to:*

18 Laurence Astill Wright  
19 Department of Health Sciences  
20 University of York  
21 Heslington  
22 York  
23 YO10 5DD  
24 Tel: 01904321344  
25 Fax: 01904 321383  
26 laurencewright@doctors.org.uk  
27

28 *Keywords*

29 Ethanol  
30 Scotland  
31 Public Policy  
32 Public Opinion  
33 Social Media  
34 Internet  
35  
36

37 *Word count:*

38 3650  
39  
40

41 *Abstract*

42  
43 *Objectives*

44 On 1st May 2018 Minimum Unit Pricing (MUP) of alcohol was introduced in Scotland. This study used  
45 Twitter posts to quantify sentiment expressed online during the introduction of MUP, conducted a thematic  
46 analysis of these perceptions, and analysed which Twitter users were associated with which particular  
47 sentiments.  
48

49 *Design and setting*

50 This qualitative social media analysis captured all tweets relating to MUP during the two weeks after the  
51 introduction of the policy. These tweets were assessed using a mixture of human and machine coding for  
52 relevance, sentiment and source. A thematic analysis was conducted.  
53  
54

55 *Participants*

56 74,639 tweets were collected over 14 days. Of these 53,574 were relevant to MUP.  
57

58 *Results*

59 Study findings demonstrate that opinion on the introduction of MUP in Scotland was somewhat divided, as  
60 far as is discernible on Twitter, with a slightly higher proportion of positive posts (35%) than negative posts



1  
2 (28%), with positive sentiment stronger in Scotland itself. Furthermore, 55% of positive tweets/retweets  
3 were originally made by health or alcohol policy-related individuals or organisations. Thematic analysis of  
4 tweets showed some evidence of misunderstanding around policy issues.  
5

### 6 *Conclusions*

7 It is possible to appreciate the divided nature of public opinion on the introduction of MUP in Scotland using  
8 Twitter, the nature of the sentiment around it, and the key actors involved. It will be possible to later study  
9 how this changes when the policy becomes more established.  
10

### 11 *Declaration of Interests*

12 We declare no competing interests.  
13

### 14 *Strengths and Limitations*

- 15 - This is the largest social media study conducted on alcohol policy with analysis of 53,574 relevant tweets  
16 - This is the first alcohol policy study to use a mixture of human and machine classification  
17 - Using the Twitter firehose and 29 synonyms in our search string maximised the number of Tweets  
18 collected  
19 - Classification was not perfect but agreement between coders was very good  
20 - Twitter is not representative of the general population  
21  
22  
23  
24  
25  
26  
27  
28  
29  
30  
31  
32  
33  
34  
35  
36  
37  
38  
39  
40  
41  
42  
43  
44  
45  
46  
47  
48  
49  
50  
51  
52  
53  
54  
55  
56  
57  
58  
59  
60

1  
2  
3  
4  
5  
6  
7  
8  
9  
10  
11  
12  
13  
14  
15  
16  
17  
18  
19  
20  
21  
22  
23  
24  
25  
26  
27  
28  
29  
30  
31  
32  
33  
34  
35  
36  
37  
38  
39  
40  
41  
42  
43  
44  
45  
46  
47  
48  
49  
50  
51  
52  
53  
54  
55  
56  
57  
58  
59  
60

### *Background*

Over the last 40 years the relative price of alcohol has decreased significantly in many countries throughout the world. Alcohol has never been as widely available and affordable as it currently is and this is primarily due to taxation falling behind increased earnings and inflation.[1] To combat the 3.3 million deaths worldwide each year and 5.1% of the global burden of disease, the World Health Organisation (WHO) recommends appropriate taxation and pricing policies in order to increase the cost of alcohol as part of an overall public health strategy to reduce harmful drinking.[2,3]

Increasing alcohol prices consistently reduces consumption[4] and a minimum unit price (MUP) of 50p in Scotland is forecast to decrease the consumption of harmful drinkers by 7%, hazardous drinkers by 2.5% and moderate drinkers by 1.2%.[5] Changes in taxation alone would require a 70% increase to cause a reduction of 7% in consumption by harmful drinkers.[5] In comparison, minimum unit pricing (MUP) specifically targets the cheapest drinks favoured by the heaviest drinkers.[4]

In the second half of the twentieth century Scotland has struggled with the increasing health, social and economic consequences of greater alcohol consumption more so than the rest of the United Kingdom (UK).[6] Average weekly unit consumption and rates of chronic liver disease and cirrhosis are higher than in England and Wales.[6] There are significant economic costs in healthcare provision, crime, and lost productivity.[7] It is predicted that MUP will reduce the number of deaths due to alcohol by 60, hospital admissions by 1300 and crimes by 3500 in the first year alone.[5]

After a series of legal challenges and national debate lasting approximately five years, MUP was approved by the UK Supreme Court and was introduced to Scotland on 1 May 2018.[8] It has been demonstrated that alcohol industry submissions made to a Scottish government consultation in 2008 misrepresented the peer reviewed literature surrounding alcohol policy. [9] The arguments made against MUP during this consultation, such as the concern of a new black market alcohol industry, were reiterated by Scottish and UK newspapers in 2011 and 2012. Some newspapers argued that MUP would be ineffective and it would punish responsible drinkers and the poor, while those that advocated for MUP argued that it would reduce health and social harms. [10]

Public perception appears to be changing over time on MUP with the 2015 British Social Attitudes survey suggesting that 52% of British adults support MUP, 25% are against it and 22% are unsure,[11] compared to a British 2011 YouGov survey which suggested 47% and 44% for and against it respectively, while 9% were unsure.[12] A 2011 focus group study had suggested that British participants held largely negative attitudes towards MUP due to 'a misunderstanding of the minimum price per unit policy itself' and 'the failure to recognise the significance of small incremental reductions in alcohol consumption'.[13] A further focus group study identified beliefs consistently associated with negative attitudes of pricing policy;[14] that pricing policies will make no difference to behaviour, the government considers the national economy to be more important than the health of the general public and that government cannot be trusted.[14]

When comparing the popularity of alcohol policy approaches in a discrete choice experiment, Pechey et al.[15] demonstrate that MUP is less favoured than both regulating alcohol marketing and decreasing the number of alcohol sales outlets when consumption, health and social outcomes are not considered. However, Pechey et al.[15] do show that the popularity of MUP increases from 43% to 63% when considering its significant effects in reducing consumption and social harms. In the UK there are no robust relationships between socioeconomic status and support for alcohol policy options.[16] In other countries it has been found that heavier drinkers (whose drinking is most damaging to themselves and others) are less supportive of alcohol policy change.[17,18] Pechey et al.[15] suggest that policy makers should focus on the beneficial outcomes when advocating for MUP to increase public support.

Few studies have used online social media to try to ascertain public attitudes towards change in alcohol policy. Twitter is a social networking website where users can broadcast their opinions to a public audience. As of late 2017, Twitter had 330 million active monthly users[19] and has great potential as a resource for quantitative and qualitative analysis of public opinion. Stautz et al.[20] analysed the reaction to the updated UK alcohol guidelines in 2017, identifying that the majority of tweets were unsupportive of the adjustments, which reduced the advised limits for low risk drinking downwards for men, and that the community as a

1  
2 whole was largely opposed to alcohol policy measures. No other studies have attempted to assess public  
3 reaction to alcohol-related policy changes using Twitter, although studies have assessed the perception of  
4 cannabis use,[21] electronic cigarettes[22] and electronic cigarette marketing.[23]  
5

6 This study used Twitter posts to quantify sentiment expressed online during the introduction of MUP,  
7 conducts a thematic analysis of these perceptions, and analyses which Twitter users are associated with  
8 which particular sentiments. Our specific research questions were as follows: 1. What are the proportions of  
9 positive, negative and neutral tweets? 2. What themes are commonly expressed? 3. Which Twitter users are  
10 expressing which themes? 4. Do the results mirror population survey data and other qualitative research  
11 surrounding MUP?  
12

### 13 *Methods*

14 Data were collected from Twitter using the Gnip PowerTrack firehose provided by Discovertext (a text  
15 analytics software - <https://discovertext.com>). Discovertext, which has been used in previous Twitter  
16 research,[23] was also used to archive and machine-code tweets. Data collection started on 29 April 2018,  
17 with the introduction of MUP on 1 May 2018. Due to the large volume of tweets collected, data collection  
18 was stopped at 14 days ending on 12th May 2018. Research methods were in accordance with Rivers' and  
19 Lewis'[24] recommendations for the ethical use of Twitter data.  
20

21  
22 Search terms were trialled using Twitter's free search Application Programming Interface (API -  
23 <https://twitter.com/search-advanced>). Terms that produced more than one search result relating to MUP on  
24 the first page of search results were included. Different terms and spellings were trialled, and hashtags that  
25 were repeatedly mentioned in tweets were included. Slang terms for alcohol were identified using online  
26 thesauruses (e.g [www.urbandictionary.com](http://www.urbandictionary.com)) and promising search terms included. Only English language  
27 tweets were included. The Twitter firehose was used to collect all publicly available tweets corresponding to  
28 the relevant search terms without the limitations of the Twitter API.  
29

30 The final search strategy was:

31  
32 ((minimum unit price) OR (minimum unit pricing) OR (minimum pricing) OR (minimum price) OR  
33 (minimum alcohol price) OR (minimum alcohol pricing) OR (minimum booze price) OR (minimum booze  
34 pricing) OR (min booze price) OR (min booze pricing) OR (min unit price) OR (min unit pricing) OR (min  
35 alcohol price) OR (min alcohol pricing) OR (MUP) OR (50p unit) OR (Scotland alcohol) OR (Scotland  
36 booze) OR (Scotland bevy) OR (Scotland min price) OR (Scotland min pricing) OR (alcohol unit) OR  
37 (minimum price per unit) OR (cheap booze Scotland) OR (minimum cost alcohol) OR (min cost alcohol) OR  
38 #minimumunitpricing OR #mupsaveslives OR #MUP) lang:en  
39  
40

41 Tweets were initially coded as relevant or irrelevant by a single human coder. The human coder endeavours  
42 were used to train Discovertext's machine classifier using a Naive Bayes algorithm. This allows machine  
43 coding of remaining tweets and was then applied to the full selection of tweets. While the algorithm was  
44 excellent at excluding irrelevant tweets, sometimes these irrelevant tweets were incorrectly classified as  
45 relevant. This was an iterative process and so the machine classifier was retrained until it reached an  
46 acceptable degree of accuracy. The agreement between machine classifier and human coder (LAW) was  
47 calculated using a kappa score on an overlapping selection of 100 tweets. The human coder's work was  
48 validated against a second human coder (AB) on an overlapping selection of 500 tweets. Irrelevant tweets  
49 were then discarded.  
50

51 Once relevant tweets were separated from irrelevant, a similar process was used to classify tweets according  
52 to sentiment. A single human coder classified relevant tweets into positive, negative and neutral. The coding  
53 of the primary coder was validated against the coding of the second human coder using a kappa score on an  
54 overlapping sample of 200 tweets. Series of 200 tweets were double classified until kappa scores greater than  
55 0.7 were achieved and this was used to train a new custom machine classifier that was applied to all the  
56 relevant tweets. Inaccuracies in machine coding were refined by human coding of key tweets to retrain the  
57 algorithm. Again, machine coding was validated using a kappa score on an overlapping sample of 100  
58 tweets.  
59  
60

1  
2 Once relevant tweets were separated into positive, negative and neutral, a random sample of 500 tweets was  
3 taken from each of the three subgroups using DiscoverText's random sampling tool. These 1500 tweets were  
4 analysed and single coded to assess the predominant themes. Prior to assessment we reviewed previous  
5 media arguments for and against MUP,[10] and various public surveys [25] to establish the range of  
6 anticipated themes (here we identified 4 positive themes and 8 negative themes). The subsequent process of  
7 single coding to assess the predominant themes was an iterative process and when a theme was not  
8 congruent with the anticipated themes, it was considered a newly emerging theme and this was added. 2 new  
9 themes emerged through this process, 1 positive and 1 negative.

11 New themes, in addition to those already identified, emerged only in the initial stages of analysis and no new  
12 themes emerged in the later stages of analysis (the final 150 tweets of each 500 tweet sample). Thus it was  
13 determined that sufficient saturation had been reached, and no additional tweets needed to be examined. The  
14 popularity of each theme was also assessed in each random sample.

16 These three random samples of 500 tweets were also analysed to determine the source of the tweets. A single  
17 human coder examined each author's Twitter page. For each tweet/retweet, the username, full name,  
18 associated biography and the associated results from an internet search engine (<https://www.google.com>)  
19 were examined to determine the user's background. The same process was used to determine if the source  
20 self identified as Scottish or lived in Scotland or not (only 1.6% of Twitter users have their geolocation  
21 activated and so inferences must be made from their profile).[26] For example, Twitter profiles contain a  
22 space for a user to write their location and if this was a Scottish place it was assumed that the user was  
23 Scottish. Some users did not write a location but had explicit references to the place they lived in their  
24 tweets. Chi-squared tests were used to determine if any differences in proportions reached statistical  
25 significance ( $p$ -value  $<0.05$ ) in categorical variables.

### 28 *Patient and Public Involvement (PPI)*

29 There was no PPI in the design or conduct of this study. As participants did not explicitly consent to their  
30 Tweets being used in this specific research paper, paraphrased examples of Tweets were used to retain  
31 anonymity.

### 33 *Results*

35 74,639 tweets were collected over 14 days. 62,879 of these tweets were manually coded as either 'relevant'  
36 to MUP or 'not relevant' by the same coder (LAW). The Naive Bayes algorithm subsequently coded the  
37 remaining 11,760 tweets. 500 tweets were coded by both the primary coder and a second coder (AB). Of  
38 these 500 tweets, there was a 97% agreement with a kappa score of 0.95. This indicates an excellent level of  
39 agreement. In order to validate the coding of the algorithm, 100 tweets were coded by both the primary coder  
40 (LAW) and the algorithm. For these 100 tweets there was a 97% agreement with a kappa score of 0.94,  
41 providing further reassurance about reliability on relevance.

43 53,574 (72%) tweets were classified as relevant, while 21,065 (28%) were classified as 'not relevant'. The  
44 irrelevant tweets made no reference to the MUP of alcohol in any context. These 53,574 relevant tweets were  
45 subsequently classified according to sentiment. 57,801 tweets were manually coded. 18,741 were coded as  
46 positive (35%), 14,866 as negative (28%), 17,302 as neutral (32%), and 2665 as not relevant (5%). In the  
47 200 tweets coded by both the primary and secondary coder there was a kappa score of 0.75. The kappa  
48 scores were: positive - 0.79, negative - 0.74, neutral - 0.76, not relevant - 0.73. This shows good agreement  
49 for sentiment tweets. For 100 tweets coded by both the primary coder (LAW) and the algorithm there was a  
50 96% agreement with a kappa score of 0.94.

52 From each sentiment (positive, negative and neutral) 500 randomly selected tweets were analysed for  
53 predominant themes. These were elaborated through the process of thematically coding each tweet and new  
54 themes were added as they occurred until saturation was reached. Twitter based thematic analysis is difficult  
55 to automate using machine algorithms due to abbreviations, emoticons and sarcasm[27] and we relied  
56 exclusively on human coding. The findings are presented in Table 1. Perceived ability to reduce health harms  
57 was the most prominent theme in the positive tweets, skepticism about effects on problem drinkers was the  
58 most prominent in the negative tweets, and factual information were the most prominent theme in the neutral  
59 tweets. In each of these sentiment categories a small proportion of tweets (ranging from 1.6-5.2%) were  
60

found to be misclassified. Some were irrelevant but falsely classified as relevant, while some were of another sentiment. It is impossible to say whether it was human or machine coding which produced this error.

*Table 1: Results of thematic analysis of positive, negative and neutral tweets with paraphrased examples*

| <i>Theme of positive tweets</i>                                              | <i>n</i> | <i>%</i> | <i>Paraphrased example</i>                                                                                           |
|------------------------------------------------------------------------------|----------|----------|----------------------------------------------------------------------------------------------------------------------|
| Reduces health harms                                                         | 352      | 70.4     | Minimum Unit Pricing will decrease hospital admissions and save lives #mupsaveslives                                 |
| Reduces social harms                                                         | 13       | 2.6      | This will greatly reduce alcohol-fuelled violence and other countries must follow                                    |
| Effectively targets the cheapest, strongest alcohol                          | 36       | 7.2      | Strong cider sold at pocket money prices is hugely damaging                                                          |
| Scotland has an alcohol problem and something must be done                   | 26       | 5.2      | This country has an awful relationship with drink - let's try MUP                                                    |
| MUP is an evidence-based policy                                              | 5        | 1.0      | The evidence backs MUP, which has been approved by the courts and will be extensively evaluated with a sunset clause |
| Nil reason given                                                             | 60       | 12.0     | Excellent work from the SNP!                                                                                         |
| Incorrectly classified as positive                                           | 8        | 1.6      |                                                                                                                      |
| Total                                                                        | 500      | 100      |                                                                                                                      |
| <i>Theme of negative tweets</i>                                              |          |          |                                                                                                                      |
| <i>Theme of negative tweets</i>                                              | <i>n</i> | <i>%</i> | <i>Paraphrased example</i>                                                                                           |
| Alcoholics will not decrease their alcohol intake                            | 138      | 27.6     | Alcoholics will not buy less but their children will go without so they can get it                                   |
| Increase in illicit alcohol production and/or encourage cross-border trading | 71       | 14.2     | Hoads will rush over the border to stock up on frosty jacks - who would've thought we'd have a booze cruise in 2018  |
| Libertarian                                                                  | 54       | 10.8     | First the sugar tax and now this - the nanny state won't stop                                                        |
| A tax on the poor                                                            | 52       | 10.4     | Another example of a classist poor-bashing policy                                                                    |
| Increase in drug use and/or petty crime                                      | 23       | 4.6      | Neds will rob grannies for booze money and the jakeys will turn to drugs instead                                     |
| Punishes responsible drinkers                                                | 17       | 3.4      | A few people can't drink responsibly and now everyone else has to pay the price?                                     |
| Increases retailer profits                                                   | 6        | 1.2      | All this will do is line the pockets of billionaires - the supermarkets can't believe their luck                     |
| Harms businesses                                                             | 2        | 0.4      | How many jobs will be lost from this?                                                                                |
| Alcohol consumption is a cultural problem                                    | 3        | 0.6      | Other countries with cheap alcohol don't have the same problems - the problem isn't to do with the price             |
| Nil reason given                                                             | 108      | 21.6     | This new alcohol law is embarrassing bs #SNPfail                                                                     |
| Incorrectly classified as negative                                           | 26       | 5.2      |                                                                                                                      |
| Total                                                                        | 500      | 100      |                                                                                                                      |
| <i>Theme of neutral tweets</i>                                               |          |          |                                                                                                                      |
| <i>Theme of neutral tweets</i>                                               | <i>n</i> | <i>%</i> | <i>Paraphrased example</i>                                                                                           |
| Factual                                                                      | 301      | 60       | Scotland introduces new alcohol law                                                                                  |

|                                   |     |    |                                                                                                                    |
|-----------------------------------|-----|----|--------------------------------------------------------------------------------------------------------------------|
| Humour                            | 102 | 20 | Great that Scotland are adopting the alcohol pricing design they have trialled for so long at the Edinburgh fringe |
| Balanced/Unclear Sentiment        | 82  | 16 | On the one hand it could reduce overconsumption of alcohol, but on the other it could encourage a black market     |
| Incorrectly classified as neutral | 15  | 3  |                                                                                                                    |

The random samples of 500 tweets divided by sentiment were next classified according to the background of the Twitter user who posted the tweet. In the case of retweets this was the original tweeter. It was not possible to determine who retweets were made by. The users were divided up into the groups as in Table 2. Miscellaneous users were those accounts who did not fall into any of the other groups and largely consisted of private companies and spam accounts.

Table 2: Source analysis of tweets and retweets from positive, negative and neutral sub-groups

|          |          | Original source of tweet or retweet |                                               |                                     |                                                  |                         |               |                                                     | Total |
|----------|----------|-------------------------------------|-----------------------------------------------|-------------------------------------|--------------------------------------------------|-------------------------|---------------|-----------------------------------------------------|-------|
|          |          | Member of public                    | Health/alcohol policy organisation/individual | Media/news organisations/individual | Alcohol industry-related organisation/individual | Celebrity/public figure | Miscellaneous | Incorrectly classified as positive/negative/neutral |       |
| Positive | <i>n</i> | 85                                  | 275                                           | 91                                  | 1                                                | 17                      | 25            | 6                                                   | 500   |
|          | %        | 17                                  | 55                                            | 18.2                                | 0.2                                              | 3.4                     | 5.0           | 1.2                                                 | 100   |
| Negative | <i>n</i> | 287                                 | 53                                            | 56                                  | 5                                                | 2                       | 81            | 16                                                  | 500   |
|          | %        | 57.4                                | 10.6                                          | 11.2                                | 1.0                                              | 0.4                     | 16.2          | 3.2                                                 | 100   |
| Neutral  | <i>n</i> | 189                                 | 45                                            | 109                                 | 18                                               | 10                      | 120           | 9                                                   | 500   |
|          | %        | 37.8                                | 9.0                                           | 21.8                                | 3.6                                              | 2.0                     | 24            | 1.8                                                 | 100   |

Table 3 presents data on source of the tweets, with more positive sentiment demonstrated among those which were likely Scottish. To further examine these data, we used a chi-square test and found that there was a significant difference in sentiment between likely Scottish and not obviously Scottish Twitter accounts (chi-square statistic 22.659,  $df = 2$ ,  $p$ -value  $< 0.001$ ).

Table 3: Source nationality analysis of tweets and retweets from positive, negative and neutral subgroups

|          |   | Source nationality |                        |                        |                                            |       |
|----------|---|--------------------|------------------------|------------------------|--------------------------------------------|-------|
|          |   | Likely Scottish    | Not obviously Scottish | Unable to view profile | Not correctly assigned the right sentiment | Total |
| Positive | N | 293                | 187                    | 14                     | 6                                          | 500   |
|          | % | 58.6               | 37.4                   | 2.8                    | 1.2                                        | 100   |
| Negative | N | 218                | 204                    | 65                     | 13                                         | 500   |
|          | % | 43.6               | 40.8                   | 13                     | 2.6                                        | 100   |
| Neutral  | N | 219                | 259                    | 13                     | 9                                          | 500   |
|          | % | 43.8               | 51.8                   | 2.6                    | 1.8                                        | 100   |

### Discussion

Study findings demonstrate that public opinion on the introduction of MUP in Scotland was somewhat divided, with a slightly higher proportion of positive posts (35%) than negative (28%) or neutral (32%). This was the case particularly in Scotland. These findings mirror previous survey data that suggest a growing proportion of the British public favour MUP than are against it.[11]

Public opinion alone does not dictate alcohol policy and there is often significant industry and political will to resist change. There do, however, remain complex interactions between public opinion and shifts in alcohol policy. Österberg and colleagues[28] demonstrated that a decrease in alcohol excise duty in Finland in 2004 and a subsequent rise in alcohol related harm led to an increase in support for alcohol policies to counteract these trends. In Ireland high levels of alcohol consumption and a doubling of alcohol related street violence over seven years led to public discussions which culminated in increased alcohol taxation, via increased support for alcohol policies.[29] There is some suggestion in this study and the literature on which it draws that Scotland has followed a similar pattern to Finland and Ireland where it appears that an increase in alcohol harms has prompted public discussion putting alcohol policy change on policy agendas. A more nuanced historical study would be needed to investigate how far this is true, and the roles of political actors in relation to public opinion.[30,31]

In 1984 John Kingdon proposed that shifts in public policy require the overlapping of three different factors - the public acknowledgement of a problem, a clear solution to a problem, and also the political will to address the issue. [32] In relation to MUP there was first a public discussion of the harms of alcohol consumption. Researchers and public health experts subsequently paid more attention to restrictive alcohol policies as a solution to this problem, and then the SNP showed the political will to address these alcohol harms [30,31]. These three factors may have overlapped to create a unique 'window of opportunity' to introduce MUP.

Only one other study has examined social media responses (analysing 3061 tweets) to alcohol policy-related developments.[20] The present study is thus the largest conducted on alcohol policy with analysis of 53,574 relevant tweets and the first to use a mixture of human and machine classification. Stautz et al.[20] showed a predominantly negative reaction to updated alcohol guidelines (27.4% negative vs 6.8% positive).

There are several interpretations of the large difference in sentiment between the updated alcohol guidelines and the introduction of MUP. While it is possible that public support for MUP is far greater, it is also

possible that because Stautz et al.[20] only followed one hashtag (while we followed 29 different synonyms accounting for different terminology and spellings), this procedure yielded a less representative sample. In our study the most popular hashtag relating to MUP was only used in 3.8% of relevant tweets and so we would not recommend searching based on hashtags alone when conducting future alcohol policy-related research.

Thematic analysis of positive tweets showed less variation in arguments supporting MUP than against it. 70.4% of positive tweets focused on the health benefits of MUP and a minority focused on other views. This reflects the introduction of MUP for primarily public health reasons. Furthermore, health/alcohol policy organisations/individuals tweets or retweets were the original sources of the majority of positive tweets surrounding MUP. This suggested a coordinated response by public health organisations focusing on a single message - that MUP reduces alcohol-related health problems. These findings suggest implications for advocacy groups investing in social media to influence public opinion.

Additionally, our study found that 24.9% of the 1500 randomly selected sentiment tweets were made by health/alcohol policy-related Twitter accounts, while Stautz et al.[20] demonstrated 12.4% of tweets relating to the updated UK alcohol guidelines were made by health related individuals/organisations. The responses of health advocacy groups to MUP appears to be more effective than that to alcohol guidelines, in part because of the ongoing failure to implement UK public information campaigns on the new guidelines, and the remarkable refusal of alcohol producers to carry the revised guidelines on alcohol packaging. As Pechey et al.[15] recommend, Scottish policy-makers have given prominence to the expected outcomes of MUP.

Many of the negative themes expressed were similar to alcohol industry framings of the issues from earlier on in the public debate.[9,33] Following on from the industry's attempts to obstruct the implementation of MUP through legal processes, the alcohol actors we identified through Twitter continued to propagate the negative framing of MUP in an attempt to marginalise those arguments based on peer-reviewed literature. Yet, by the time of implementation of the policy, it is striking how little such activity there was by industry actors. It seems more likely that alcohol industry actors pursued other avenues to alter public perception post-MUP implementation rather than that they were inactive, and these were not captured in this study.

The similarity we have demonstrated in findings between Twitter-based research to gauge public perceptions and general population surveys may provide some support for social media-based methods as adjuncts to survey based opinion polling. As set out by our research questions, we showed that 35% of tweets were positive, 28% were negative and 32% were neutral. Similarly the 2011 YouGov survey suggested that 47% supported MUP, while 44% opposed it and 9% were unsure.[12] Likewise the 2015 British Social Attitudes survey suggests that 52% of British adults support MUP, while 25% are against it and 22% are unsure.[11] Gauging public opinion via social media has numerous practical advantages over polling, though validation methods remain to be developed. There will probably be lower costs given that the data are already in the public domain, and machine algorithms can be used to code items with high inter-rater reliability with human coders. Social media research does, however, bring with it new ethical challenges that must be considered by future researchers.[34]

Using the Discovertext software, we were unable to distinguish between original tweets and retweets. It is likely that a significant proportion of the tweets were retweets, but we are unable to gauge what proportion, and this remains a limitation of our study. While retweets are perceived by many as an expression of agreement with the original tweet, this is not always the case. On occasion, retweets were accompanied by a comment from the user. In these circumstances the sentiment of the extra comment was analysed primarily, rather than the sentiment of the retweet.

Other limitations of our work include uncertainty about the inferences about public opinion that can be made from this data. Twitter users are unlikely to be representative of the general population, as they are more likely to be urban dwelling, male, and have higher educational achievement.[35,36] Twitter users tend to hold more extreme views[37] and surround themselves with those who hold similar opinions (in what is known as echo-chambers).[38] This makes any inferences in relation to previous polling data questionable. Furthermore, classification was not perfect and 3.3% of tweets were included in the wrong sentiment group in our random sample of 1500 tweets. It is also possible our results were subject to confounding, for example, by political affiliation. Many accounts provided limited biographical information and so this was



1  
2 not measured or adjusted for. In addition, while we demonstrated a high proportion of positive posts, this  
3 may not necessarily translate into behaviour change, or speak directly to the possible success of the policy.  
4 Nonetheless, it is possible to appreciate the divided nature of public opinion on the introduction of MUP, the  
5 nature of the sentiment around it, and key actors involved, and it will be possible to later study how this  
6 picture changes when the policy becomes more established.  
7

### 8 *Ethical Approval*

9 The University of York Health Sciences Research Governance Committee was consulted and recommended  
10 that the study did not require ethical approval as the Twitter data used were already in the public domain.  
11

### 12 *Contributors*

13 LAW, SG and JM were responsible for the original study design. LAW was responsible for primary data  
14 coding, analysis and for initial drafting of this report. AB was the second coder. LAW, SG, AB and JM were  
15 responsible for subsequent interpretation, editing and rewriting for the report.  
16

### 17 *Data Availability*

18 Data may be obtained from Discovertext (an online text analytics software - <https://discovertext.com>) but are  
19 not publicly available. Discovertext was used to collect, archive and machine code tweets.  
20  
21

### 22 *Funding*

23 This work was supported by a Wellcome Trust Investigator Award in Humanities and Social Science  
24 (200321/Z/15/Z) to JM.  
25

### 26 *Declaration of Interests*

27 We declare no competing interests.  
28  
29

### 30 *References*

- 31 1. Babor T. Caetano R. 2010. Alcohol: No Ordinary Commodity. 2nd edition. New York: Oxford University  
32 Press. ISBN: 0199551146.  
33
- 34 2. Monteiro M. 2011. The Road to a World Health Organization Global Strategy for Reducing the Harmful  
35 Use of Alcohol. Alcohol Res Health. 34(2). PMID: [22330226](https://pubmed.ncbi.nlm.nih.gov/22330226/).  
36
- 37 3. World Health Organization. 2010. Global Strategy to Reduce Harmful Use of Alcohol [Online]. Available  
38 at: [http://www.who.int/substance\\_abuse/activities/gsrhua/en/](http://www.who.int/substance_abuse/activities/gsrhua/en/). Accessed 16/08/2018 ([Archived by](http://www.webcitation.org/71mmbuaiB)  
39 [WebCite® at http://www.webcitation.org/71mmbuaiB](http://www.webcitation.org/71mmbuaiB)).  
40  
41
- 42 4. Sharma A. Sinha K. Vandenberg, B. 2017. Pricing as a means of controlling alcohol consumption. Br Med  
43 Bull. 123(1). PMID: 28910991.  
44
- 45 5. Angus C. Holmes J. Pryce R. Meier P. Brennan A. 2016. Model-based appraisal of the comparative  
46 impact of Minimum Unit Pricing and taxation policies in Scotland. An adaptation of the Sheffield Alcohol  
47 Policy Model version 3 [Online]. Available at:  
48 [https://www.sheffield.ac.uk/polopoly\\_fs/1.565373!/file/Scotland\\_report\\_2016.pdf](https://www.sheffield.ac.uk/polopoly_fs/1.565373!/file/Scotland_report_2016.pdf). Accessed: 06/05/18  
49 ([Archived by WebCite® at http://www.webcitation.org/71mlo3iju](http://www.webcitation.org/71mlo3iju)).  
50  
51
- 52 6. Leon D. McCambridge J. (2006). Liver cirrhosis mortality rates in Britain from 1950 to 2002: an analysis  
53 of routine data. Lancet. 367(9504). PMID: 16399153.  
54
- 55 7. Scottish Government. 2008. Changing Scotland's relationship with alcohol: a discussion paper on our  
56 strategic approach [Online]. Available at: <http://www.gov.scot/Resource/Doc/227785/0061677.pdf>.  
57 Accessed: 06/05/18 ([Archived by WebCite® at http://www.webcitation.org/71mmCjRMw](http://www.webcitation.org/71mmCjRMw)).  
58  
59  
60

- 1  
2 8. Meier P. Brennan A. Angus C. Holmes J. 2017. Minimum unit pricing for alcohol clears final legal hurdle  
3 in Scotland. *BMJ*. 359. PMID: 29162561.  
4
- 5 9. McCambridge J. Hawkins B. Holden C. 2013. Industry use of evidence to influence alcohol policy: a case  
6 study of submissions to the 2008 Scottish government consultation. *PLoS Med*. 10(4). PMID: 23630458.  
7
- 8 10. Hilton S. Wood K. Patterson C. Katikireddi, S. 2014. Implications for alcohol minimum unit pricing  
9 advocacy: What can we learn for public health from UK newsprint coverage of key claim-makers in the  
10 policy debate? *Soc Sci Med*. 102(100). PMID: [24565153](#).  
11
- 12 11. NatCen Social Research. 2015. Attitudes to alcohol. Findings from the 2015 British Social Attitudes  
13 survey [Online]. Available at: <http://bsa.natcen.ac.uk/media/39126/bsa-attitudes-to-alcohol-final.pdf>.  
14 Accessed: 09/05/2018 ([Archived by WebCite® at http://www.webcitation.org/71mm05C1f](#)).  
15
- 16 12. YouGov. 2011. 'Pocket money' prices [Online]. Available at:  
17 <https://yougov.co.uk/news/2011/01/25/pocket-money-prices-alcohol/>. Accessed: 07/05/2018 ([Archived by](#)  
18 [WebCite® at http://www.webcitation.org/71mmQgn15](#)).  
19
- 20 13. Hagger M. Lonsdale A. Baggott R. Penny G. Bowen M. 2011. The Cost of Alcohol: The Advocacy for a  
21 Minimum Price per Unit in the UK [Online]. Available at:  
22 [http://alcoholresearchuk.org/downloads/finalReports/FinalReport\\_0082](http://alcoholresearchuk.org/downloads/finalReports/FinalReport_0082). Accessed 07/05/18 ([Archived by](#)  
23 [WebCite® at http://www.webcitation.org/71mltCAb8](#)).  
24
- 25 14. Somerville C. Marteau T. Kinmonth A. Cohn S. 2015. Public attitudes towards pricing policies to change  
26 health-related behaviours: a UK focus group study. *Eur J Public Health*. 25(6). PMID: 25983329.  
27
- 28 15. Pechey R. Burge P. Mentzakis E. Suhrcke M. Marteau M. 2014. Public acceptability of population-level  
29 interventions to reduce alcohol consumption: a discrete choice experiment. *Soc Sci Med*. 113. PMID:  
30 24858928.  
31
- 32 16. Erskine S. Maheswaran R. Pearson T. Gleeson D. 2010. Socioeconomic deprivation, urban-rural location  
33 and alcohol-related mortality in England and Wales. *BMC Public Health*. 10(99). PMID: 20184763.  
34
- 35 17. Giesbrecht N. Lalomiteanu A. Anglin L. Adlaf E. 2007. Alcohol marketing and retailing: Public opinion  
36 and recent policy developments in Canada. *Journal of Substance Use*. 6. doi:10.1080/14659890701262189.  
37
- 38 18. Giesbrecht N. and Livingston M. 2014. Public perceptions and alcohol policies: Six case studies that  
39 examine trends and interactions. *Drug Alcohol Rev*. 33(3). doi:[10.1111/dar.12139](#).  
40
- 41 19. Statista. 2018. Number of monthly active Twitter users worldwide from 1st quarter 2010 to 4th quarter  
42 2017 (in millions) [Online]. Available at: [https://www.statista.com/statistics/282087/number-of-monthly-](https://www.statista.com/statistics/282087/number-of-monthly-active-twitter-users/)  
43 [active-twitter-users/](https://www.statista.com/statistics/282087/number-of-monthly-active-twitter-users/). Accessed: 08/05/2018 ([Archived by WebCite® at](#)  
44 <http://www.webcitation.org/71mmJR0Bd>).  
45
- 46 20. Stautz K. Bignardi G. Hollands G. Marteau T. et al. 2017. Reactions on Twitter to updated alcohol  
47 guidelines in the UK: a content analysis. *BMJ Open* 7(2). doi:[10.1136/bmjopen-2016-015493](#).  
48
- 49 21. Thompson L. Rivara F. Whitehill J. 2013. Prevalence of Marijuana-Related Traffic on Twitter, 2012–  
50 2013: A Content Analysis. *Cyberpsychol Behav Soc Netw*. 18(6). PMID: 26075917.  
51
- 52 22. Cole-Lewis H. Pugatch J. Sanders A. Varghese A. Posada S. Yun, C. Schwarz M. Auguston E. 2015.  
53 Social Listening: A Content Analysis of E-Cigarette Discussions on Twitter. *J Med Internet Res*. 17(10).  
54 PMID: 26508089.  
55  
56  
57  
58  
59  
60

- 1  
2  
3 23. Huang J. Kornfield R. Szczyпка G. Emery S. 2014. A cross-sectional examination of marketing of  
4 electronic cigarettes on Twitter. *Tob Control*. 23(3). PMID: [24935894](#).  
5
- 6 24. Rivers C. Lewis B. 2014. Ethical research standards in a world of big data. *F1000Research*. 38(1-10).  
7 doi:[10.12688/f1000research.3-38.v1](#).  
8
- 9 25. Alcohol Policy UK. 2016. British Social Attitudes survey 2015: is support for minimum pricing  
10 growing? [Online]. Available at: [http://www.alcoholpolicy.net/2016/09/social-survey-attitudes-2015-is-](http://www.alcoholpolicy.net/2016/09/social-survey-attitudes-2015-is-support-for-minimum-pricing-growing.html)  
11 [support-for-minimum-pricing-growing.html](http://www.alcoholpolicy.net/2016/09/social-survey-attitudes-2015-is-support-for-minimum-pricing-growing.html). Accessed 04/05/18 (Archived by WebCite® at  
12 <http://www.webcitation.org/71mlXdlwf>).  
13
- 14 26. Leetaru K. Wang S. Cao G. Padmanabhan A. Shook E. 2013. Mapping the global Twitter heartbeat: The  
15 geography of Twitter. *First Monday*. 18(5). doi:[10.5210/fm.v18i5.4366](#).  
16
- 17 27. Thelwall M. Buckley K. Paltoglou G. 2012. Sentiment strength detection for the social Web. *Journal of*  
18 *the American Society for Information Science and Technology*. 63(1). doi:[10.1002/asi.21662](#).  
19
- 20 28. Österberg E. Lindeman M. Karlsson T. 2014. Changes in alcohol policies and public opinions in Finland  
21 2003-2013. *Drug Alcohol Rev*. 33(3). PMID: 24628708.  
22
- 23 29. Hope A. 2014. The ebb and flow of attitudes and policies on alcohol in Ireland 2002–2010. *Drug Alcohol*  
24 *Rev*. 33(3). PMID: 24628739.  
25
- 26 30. Holden C. Hawkins B. 2014. ‘Whisky gloss’: The alcohol industry, devolution and policy communities  
27 in Scotland. *Public Policy & Administration*. 28. doi:[10.1177/0952076712452290](#).  
28
- 29 31. McCambridge J. Hawkins B. Holden C. 2014. Vested interests in addiction research and policy. The  
30 challenge corporate lobbying poses to reducing society's alcohol problems: insights from UK evidence on  
31 minimum unit pricing. *Addiction*. 109(2). PMID: 24261642.  
32
- 33 32. Béland, D. Howlett, M. 2016. The Role and Impact of the Multiple-Streams Approach in Comparative  
34 Policy Analysis. *Journal of Comparative Policy Analysis*. 18(3).  
35
- 36 33. Hawkins B. McCambridge J. 2014. Industry Actors, Think Tanks, and Alcohol Policy in the United  
37 Kingdom. *Am J Public Health*. 104(8). PMID: 24922137.  
38
- 39 34. Golder S. Ahmed S. Norman G. Booth A. 2017. Attitudes Toward the Ethics of Research Using Social  
40 Media: A Systematic Review. *J Med Internet Res*. 19(6). PMID: 28588006.  
41
- 42 35. Mellon J. Prosser C. 2017. Twitter and Facebook are not representative of the general population:  
43 Political attitudes and demographics of British social media users. *Research and Politics*. 1(9).  
44 doi:[10.1177/2053168017720008](#).  
45
- 46 36. Mislove A. Lehmann S. Ahn Y. Onella J. Rosenquist J. 2011. Understanding the demographics of  
47 Twitter users. *Proceedings of the Fifth International AAAI Conference on Weblogs and Social Media*. AAAI  
48 Press. ISBN: 9781577355052.  
49
- 50 37. Barberá P. Rivero G. 2014. Understanding the Political Representativeness of Twitter Users. *Social*  
51 *Science Computer Review*. 33(6). doi:[10.1177/0894439314558836](#).  
52
- 53 38. Garimella K. De Francisci Morales G. Gionis A. Mathioudakis M. 2018. Political Discourse on Social  
54 Media: Echo Chambers, Gatekeepers, and the Price of Bipartisanship. *WWW 2018: The 2018 Web*  
55 *Conference*. doi:[10.1145/3178876.3186139](#).  
56  
57  
58  
59  
60
